# Supplementary material for: Are we armed with the right data? Pooled individual data review of biomarkers in people with severe upper limb impairment after stroke
Source: PubMed Central journal article supplement — Neuroimage Clin. 2016 Sep 24;13:310–9. doi: 10.1016/j.nicl.2016.09.015 (PMC5198729; doi:10.1016/j.nicl.2016.09.015), 2016-09-24
Supplement: mmc1.pdf [file mmc1.pdf]

## PROSPERO International prospective register of systematic reviews

### What is the capacity of the damaged brain to recover after a neurological injury in people with severe upper limb impairment: a systematic review

Kathryn S. Hayward, Julia Schmidt, Sue Peters, Keith R. Lohse, Katie P Wadden, Julie Bernhardt, Natasha A. Lannin, Lara A Boyd

#### Citation

Kathryn S. Hayward, Julia Schmidt, Sue Peters, Keith R. Lohse, Katie P Wadden, Julie Bernhardt, Natasha A. Lannin, Lara A Boyd. What is the capacity of the damaged brain to recover after a neurological injury in people with severe upper limb impairment: a systematic review. PROSPERO 2015:CRD42015026107 Available from [http://www.crd.york.ac.uk/PROSPERO\\_REBRANDING/display\\_record.asp?ID=CRD42015026107](http://www.crd.york.ac.uk/PROSPERO_REBRANDING/display_record.asp?ID=CRD42015026107)

#### Review question(s)

1. What are the brain biomarkers of motor recovery in people with severe upper limb impairment as a result of a neurological injury?
2. Do brain biomarkers of motor recovery differ early (6 months) in people with severe upper limb impairment as a result of a neurological injury?
3. Do brain biomarkers of motor recovery differ between people with stroke versus traumatic brain injury versus acquired brain impairment?

#### Searches

Electronic databases will be searched using a pre-determined search strategy. Databases will include MEDLINE, Ovid, CINAHL and EMBASE. Reference lists of eligible studies will be hand searched to identify potential studies that were not identified through the initial search process, along with citation tracking database, Web of Science.

Searches will be restricted to English only. In addition, we will complete a search to identify any relevant grey literature (e.g., conference proceedings and theses).

#### Types of study to be included

All study types will be included with the exception of reviews and single case studies.

#### Condition or domain being studied

Humans that have severe upper limb impairment as a result of stroke, traumatic brain injury (TBI) or acquired brain impairment (ABI)

#### Participants/ population

Populations included:

- Adult humans (19+ years) with stroke, TBI or ABI. Mixed samples are eligible if >50% of the sample has a neurological impairment of stroke, TBI or ABI.
- People who have experienced a severe upper limb impairment. Severe will be defined as per the original study. Mixed samples are eligible if >50% of the sample are severe or individual data is presented.
- People at any time period post stroke, TBI or ABI (i.e., acute, subacute or chronic).
- Populations will be excluded if they include >50% of people with progressive neurological injuries including Parkinson's disease or multiple sclerosis; or have tumours.

#### Intervention(s), exposure(s)

Included: No intervention delivered, non-pharmacological intervention (e.g., rehabilitation, behavioural, devices, complementary/alternative medicine)

Excluded: Pharmacological intervention(s)

### **Comparator(s)/ control**

No comparison group

Comparison to people with mild or moderate stroke, TBI or ABI;

Comparison to people without stroke, TBI or ABI.

### **Context**

Research institutions, rehabilitation centres, acute/subacute hospitals

### **Outcome(s)**

#### **Primary outcomes**

Primary outcomes will be measures that reflect possible brain recovery biomarkers after stroke, TBI or ABI. Brain recovery biomarkers for the purposes of this review will include functional magnetic resonance imaging (fMRI), resting state MRI, MRI, diffusion tensor imaging (DTI), electroencephalography (EEG), transcranial magnetic stimulation (TMS), magnetoencephalography (MEG), magnetic resonance spectroscopy (MRS).

Not applicable.

#### **Secondary outcomes**

Secondary outcomes will seek to explore the effect of time (i.e., less than 6-months vs. greater than 6-months); and condition on brain recovery (i.e., stroke vs. TBI vs. ABI).

### **Data extraction, (selection and coding)**

1. Two authors (KH/JS) will screen eligibility based on title and abstract using predetermined criteria. Full text of the remaining studies will be retrieved. Reports from the same study population will be linked to ensure that the data from that population is only included once in the review and analysis.
2. Two authors (KH/JS) will review the eligibility of full text studies. Authors of studies may be contacted to collect any relevant data that is missing or to clarify details of the study to ensure appropriate study inclusion. If a disagreement regarding inclusion of a study into the review occurs it will be resolved by discussion and review of criteria among the two authors. If not resolved, a third reviewer (LB) will be involved to achieve a consensus. If still not resolved, a further two authors (SP/KW) will be asked to review the study. If no consensus is reached, it will be documented in the review.
3. Two authors (KH/JS/KL) using a predetermined data collection form will extract data. A third reviewer will cross-check a subsample (SP). The data extraction form will record information regarding:
  - a. Study (i.e., authors, date, location of study, definition of severe for study),
  - b. Participants (i.e., age, gender, characteristics of neurological injury),
  - c. Brain recovery biomarkers (i.e., measure of recovery, method measurement, timing of measurement, frequency of measurement)
  - d. Clinical recovery measures (i.e., measures of impairment, activity and participant, timing of measurement, frequency of measurement)
  - e. Intervention (i.e., no intervention, non-pharmacological interventions such as behavioural, rehabilitation, etc)
  - f. Comparator (i.e., no comparator, people with mild or moderate, people with no neurological injury),

- g. Results (i.e., means, standard deviations, coefficients, p values, effect size)
- h. Missing data to be followed up for a. to g., and
- i. Miscellaneous data that is viewed to be of potential importance to this review.

If queries or discrepancies regarding data extraction occur, these will be resolved by including a third reviewer (SP) to achieve a consensus. If still not resolved, a further two authors (LB/KW/KL) will be asked to extract the data.

### **Risk of bias (quality) assessment**

Risk of bias will not be assessed.

### **Strategy for data synthesis**

Data will be entered into an excel spreadsheet and outcomes of interest will be described descriptively. Depending on the studies included in the review, an evaluation of the suitability for data pooling (e.g., meta-analysis) will be undertaken (KL).

### **Analysis of subgroups or subsets**

Subgroup analysis (descriptive and pooling) may occur if sufficient data is available to explore the effect of time (i.e., less than 6-months vs. greater than 6-months); and condition on brain recovery (i.e., stroke vs. TBI vs. ABI).

### **Dissemination plans**

Conferences, peer reviewed journal articles, educational sessions

### **Contact details for further information**

Dr Hayward

Department of Physical Therapy, Faculty of Medicine

University of British Columbia

Vancouver, BC Canada, V6T 2B5

Kathryn.Hayward@ubc.ca

### **Organisational affiliation of the review**

none

### **Review team**

Dr Kathryn S. Hayward, University of British Columbia; and Florey Institute for Neuroscience and Mental Health

Dr Julia Schmidt, University of British Columbia

Ms Sue Peters, University of British Columbia

Dr Keith R. Lohse, Auburn University

Ms Katie P Wadden, University of British Columbia

Dr Julie Bernhardt, Florey Institute for Neuroscience and Mental Health; and LaTrobe University

Dr Natasha A. Lannin, The Alfred Hospital; and LaTrobe University

Dr Lara A Boyd, University of British Columbia

### **Details of any existing review of the same topic by the same authors**

Not applicable.

### **Anticipated or actual start date**

02 September 2015

### **Anticipated completion date**

01 March 2016

**Funding sources/sponsors**

Not applicable.

**Conflicts of interest**

None known

**Other registration details**

Not applicable.

**Language**

English

**Country**

Australia, Canada, United States of America

**Subject index terms status**

Subject indexing assigned by CRD

**Subject index terms**

Biological Processes; Brain; Brain Injuries; Humans; Trauma, Nervous System; Upper Extremity

**Stage of review**

Ongoing

**Date of registration in PROSPERO**

26 October 2015

**Date of publication of this revision**

26 October 2015

**DOI**

10.15124/CRD42015026107

**Stage of review at time of this submission**

Preliminary searches

**Started**

**Completed**

Yes

No

Piloting of the study selection process

No

No

Formal screening of search results against eligibility criteria

No

No

Data extraction

No

No

Risk of bias (quality) assessment

No

No

Data analysis

No

No

---

**PROSPERO**

**International prospective register of systematic reviews**

The information in this record has been provided by the named contact for this review. CRD has accepted this information in good faith and registered the review in PROSPERO. CRD bears no responsibility or liability for the content of this registration record, any associated files or external websites.

---
